# Supplementary material for: Complementary α-arrestin-ubiquitin ligase complexes control nutrient transporter endocytosis in response to amino acids
Source: eLife. 2020 Aug 3;9:e58246. doi: 10.7554/eLife.58246 (PMC7449699; doi:10.7554/eLife.58246)
Supplement: Supplementary file 1. [file elife-58246-supp1.xlsx]

## Sheet: all PM proteins
Supplementary file 1: Fluorescence microscopy-based screen for substrates of starvation-induced endocytosis
Color code:
Signal at PM decreased during starvation
Signal at PM increased during starvation
Signal at PM unchanged during starvation
No signal at the PM
Standard name	Systematic name	Fluorescence at PM during exp. growth	- N (fluorescence at PM compared to exp. growth)	+ Met (fluorescenceat PM compared to - Met)	SGD annotated Function	Source
MUP1	YGR055W	Yes	Decreased	Decreased	High affinity methionine permease	VIY54, This study
CAN1	YEL063C	Yes	Decreased	Unchanged	Arginine permease	GFP collection (Huh et al., Nature, 2003)
TAT2	YOL020W	Yes	Decreased	Unchanged	Broad-specificity amino-acid permease - inductible by most neutral amino acids	GFP collection (Huh et al., Nature, 2003)
LYP1	YNL268W	Yes	Decreased	Unchanged	Lysine permease	GFP collection (Huh et al., Nature, 2003)
HXT1	YHR094C	Yes	Decreased	Unchanged	Low-affinity hexose facilitator	ysl1186, (Hovsepian et al., J Cell Biol. 2017)
HXT2	YMR011W	Yes	Decreased	Unchanged	Hexose facilitator of moderately low affinity for glucose	GFP collection (Huh et al., Nature, 2003)
HXT3	YDR345C	Yes	Decreased	Unchanged	Low-affinity hexose facilitator	GFP collection (Huh et al., Nature, 2003)
ITR1	YDR497C	Yes	Decreased	Unchanged	Inositol permease	GFP collection (Huh et al., Nature, 2003)
FUR4	YBR021W	Yes	Decreased	Unchanged	Uracil permease	GFP collection (Huh et al., Nature, 2003)
HNM1	YGL077C	Yes	Decreased	Unchanged	Choline permease	GFP collection (Huh et al., Nature, 2003)
PMP1	YCR024C-A	Yes	Decreased	Unchanged	Regulatory subunit for the plasma membrane H(+)-ATPase Pma1p	GFP collection (Huh et al., Nature, 2003)
PDR5	YOR153W	Yes	Decreased	Unchanged	`Full-size` ABC transporter involved in multidrug resistance	GFP collection (Huh et al., Nature, 2003)
ENB1	YOL158C	Yes	Decreased	Unchanged	Transporter of the siderophore enterobactin	GFP collection (Huh et al., Nature, 2003)
CTR1	YPR124W	Yes	Decreased	Unchanged	Plasma membrane copper transport protein	GFP collection (Huh et al., Nature, 2003)
INA1	YLR413W	Yes	Decreased	Unchanged	Protein of unknown function; not an essential gene; YLR413W has a paralog, FAT3, that arose from the whole genome duplication	OSY924 +pIS001, This study
GAP1	YKR039W	Not detected	Increased	Not detected	General amino acid permease	GFP collection (Huh et al., Nature, 2003)
MEP2	YNL142W	Not detected	Increased	Not detected	High affinity ammonium permease - proposed role also as ammonium sensor involved in pseudohyphal growth	GFP collection (Huh et al., Nature, 2003)
DIP5	YPL265W	Yes	Unchanged, but vacuolar signal increased	Unchanged	Glutamate and aspartate permease	GFP collection (Huh et al., Nature, 2003)
ATO3	YDR384C	Yes	Unchanged, but vacuolar signal increased	Unchanged	Putative ammonium transporter	GFP collection (Huh et al., Nature, 2003)
FTR1	YER145C	Yes	Unchanged, but vacuolar signal increased	Unchanged	High affinity iron transporter	GFP collection (Huh et al., Nature, 2003)
RSN1	YMR266W	Yes	Unchanged, but vacuolar signal increased	Unchanged	Membrane protein of unknown function, by similarity : Acts as an osmosensitive calcium-permeable cation channel.	GFP collection (Huh et al., Nature, 2003)
PUN1	YLR414C	Yes	Unchanged, but vacuolar signal increased	Unchanged	Plasma membrane protein with a role in cell wall integrity	GFP collection (Huh et al., Nature, 2003)
GNP1	YDR508C	Yes	Unchanged, but vacuolar signal increased	Not analyzed	High-affinity glutamine permease	GFP collection (Huh et al., Nature, 2003)
YOR1	YGR281W	Yes	Unchanged, but vacuolar signal increased	Not analyzed	`Full-size` ABC transporter involved in tolerance to toxic organic anions	GFP collection (Huh et al., Nature, 2003)
SNQ2	YDR011W	Yes	Unchanged	Unchanged	`Full-size` ABC transporter involved in multidrug resistance	GFP collection (Huh et al., Nature, 2003)
VHT1	YGR065C	Yes	Unchanged	Unchanged	Biotin (vitamin H) permease	GFP collection (Huh et al., Nature, 2003)
BAP2	YBR068C	Yes	Unchanged	Not analyzed	High-affinity leucine permease	GFP collection (Huh et al., Nature, 2003)
TAT1	YBR069C	Yes	Unchanged	Not analyzed	Amino acid transporter for valine, leucine, isoleucine, and tyrosine	GFP collection (Huh et al., Nature, 2003)
HXT5	YHR096C	Yes	Unchanged	Not analyzed	Hxt family protein with intrinsic hexose transport activity	GFP collection (Huh et al., Nature, 2003)
HXT7	YDR342C	Yes	Unchanged	Not analyzed	High-affinity hexose facilitator	ysl1551 (Hovsepian J., J Cell Biol. 2017)
FET3	YMR058W	Yes	Unchanged	Not analyzed	Ferro-O2-oxidoreductase	GFP collection (Huh et al., Nature, 2003)
ATR1	YML116W	Yes	Unchanged	Not analyzed	Putative substrate-H+ antiporter conferring resistance to aminotriazole, and acting as a boron export protein.	GFP collection (Huh et al., Nature, 2003)
AQR1	YNL065W	Yes	Unchanged	Not analyzed	Plasma membrane transporter of the major facilitator superfamily	GFP collection (Huh et al., Nature, 2003)
YDR090C	YDR090C	Yes	Unchanged	Not analyzed	Protein similar to the human lysosomal CTNS cystine transporter mediating H+-driven cystine export from lysosomes	GFP collection (Huh et al., Nature, 2003)
QDR2	YIL121W	Yes	Unchanged	Not analyzed	Putative substrate-H+ antiporter - confers resistance to quinidine	GFP collection (Huh et al., Nature, 2003)
HOL1	YNR055C	Yes	Unchanged	Not analyzed	Putative substrate-H+ antiporter - unknown biological function	GFP collection (Huh et al., Nature, 2003)
PDR12	YPL058C	Yes	Unchanged	Not analyzed	`Full-size` ABC transporter of the plasma membrane acting as a weak organic acids extrusion pump	GFP collection (Huh et al., Nature, 2003)
PMA1	YGL008C	Yes	Unchanged	Not analyzed	Plasma membrane H+ pump	GFP collection (Huh et al., Nature, 2003)
YRO2	YBR054W	Yes	Unchanged	Not analyzed	7TMD-Protein of unknown function with similarity to archaeal rhodopsins	GFP collection (Huh et al., Nature, 2003)
MID2	YLR332W	Yes	Unchanged	Not analyzed	O-glycosylated plasma membrane protein	GFP collection (Huh et al., Nature, 2003)
PSR1	YLL010C	Yes	Unchanged	Not analyzed	Plasma membrane associated protein phosphatase	GFP collection (Huh et al., Nature, 2003)
SFK1	YKL051W	Yes	Unchanged	Not analyzed	Plasma membrane protein that may act to generate normal levels of PI4P	GFP collection (Huh et al., Nature, 2003)
SLG1	YOR008C	Yes	Unchanged	Not analyzed	Sensor-transducer of the stress-activated PKC1-MPK1 kinase pathway	GFP collection (Huh et al., Nature, 2003)
YDR034W-B	YDR034W-B	Yes	Unchanged	Not analyzed	Predicted tail-anchored plasma membrane protein	GFP collection (Huh et al., Nature, 2003)
YDR210W	YDR210W	Yes	Unchanged	Not analyzed	Predicted tail-anchored plasma membrane protein with a CYSTM module	GFP collection (Huh et al., Nature, 2003)
YBR016W	YBR016W	Yes	Unchanged	Not analyzed	Tail-anchored plasma membrane protein with a conserved CYSTM module	GFP collection (Huh et al., Nature, 2003)
AXL2	YIL140W	Yes	Unchanged	Not analyzed	Integral plasma membrane protein required for axial budding	GFP collection (Huh et al., Nature, 2003)
SKG1	YKR100C	Yes	Unchanged	Not analyzed	Transmembrane protein with a role in cell wall polymer composition	GFP collection (Huh et al., Nature, 2003)
NCE102	YPR149W	Yes	Unchanged	Not analyzed	Protein of unknown function	GFP collection (Huh et al., Nature, 2003)
PMP2	YEL017C-A	Yes	Unchanged	Not analyzed	Proteolipid associated with plasma membrane H(+)-ATPase (Pma1p)	GFP collection (Huh et al., Nature, 2003)
YOL019W	YOL019W	Yes	Unchanged	Not analyzed	Protein of unknown function,	GFP collection (Huh et al., Nature, 2003)
TPO4	YOR273C	Yes	Unchanged	Not analyzed	Proposed vacuolar polyamine transporter	GFP collection (Huh et al., Nature, 2003)
OPT1	YJL212C	Not detected	Not detected	Not analyzed	Tetra- and pentapeptide permease - high-affinity glutathione transporter	GFP collection (Huh et al., Nature, 2003)			C	C	-		Tna1 (mislocalized to ER here)
PTR2	YKR093W	Not detected	Not detected	Not analyzed	Di- and tripeptide permease	GFP collection (Huh et al., Nature, 2003)			C	C	-		Ato3 (vacuolar and bad signal- growth conditions?)
MUP3	YHL036W	Not detected	Not detected	Not analyzed	Low-affinity methionine permease	GFP collection (Huh et al., Nature, 2003)			C	C/vm	-		Tat1 (not endocytosed)
YCT1	YLL055W	Not detected	Not detected	Not analyzed	Plasma membrane specific L-cysteine permease	GFP collection (Huh et al., Nature, 2003)			C	C	-		Flc1 (not in the screen)
BAP3	YDR046C	Not detected	Not detected	Not analyzed	Broad-specificity amino-acid permease - inductible by most neutral amino acids	GFP collection (Huh et al., Nature, 2003)			V/c	V	?		Bap3 (vacuolar and bad signal- growth conditions?)
AGP1	YCL025C	Not detected	Not detected	Not analyzed	Broad-specificity, relatively-low-affinity, amino-acid permease - inductible by most neutral amino acids	GFP collection (Huh et al., Nature, 2003)			ER	ER	-		Pho87 (very low 'cytosolic' signal)
MEP3	YPR138C	Not detected	Not detected	Not analyzed	Low affinity ammonium permease	GFP collection (Huh et al., Nature, 2003)			C	C	-
MEP1	YGR121C	Not detected	Not detected	Not analyzed	High-affinity ammonium permease	GFP collection (Huh et al., Nature, 2003)			C	C	-
AGP2	YBR132C	Not detected	Not detected	Not analyzed	Plasma membrane protein with proposed role in carnitine, polyamine and amino-acid transport	GFP collection (Huh et al., Nature, 2003)			C/vm/dots on vm	C/vm	-
TPO1	YLL028W	Not detected	Not detected	Not analyzed	Plasma membrane polyamine-H+ antiporter	GFP collection (Huh et al., Nature, 2003)			C	C	-
TPO2	YGR138C	Not detected	Not detected	Not analyzed	Proposed vacuolar polyamine transporter	GFP collection (Huh et al., Nature, 2003)			C/dots	C	-
HXT6	YDR343C	Not detected	Not detected	Not analyzed	High-affinity hexose facilitator	GFP collection (Huh et al., Nature, 2003)			PM	V/PM	`++
MCH1	YDL054C	Not detected	Not detected	Not analyzed	Protein with similarity to mammalian monocarboxylate permeases	GFP collection (Huh et al., Nature, 2003)			VM/C	VM/C	-
MCH3	YNL125C	Not detected	Not detected	Not analyzed	Protein with similarity to monocarboxylate permeases	GFP collection (Huh et al., Nature, 2003)			C	C	-
GAL2	YLR081W	Not detected	Not detected	Not analyzed	Galactose permease	GFP collection (Huh et al., Nature, 2003)			C	C	-
ADY2	YCR010C	Not detected	Not detected	Not analyzed	Probable plasma membrane acetate permease, similar to Yarrowia lipolytica Gpr1	GFP collection (Huh et al., Nature, 2003)			C	C	-
STL1	YDR536W	Not detected	Not detected	Not analyzed	Glycerol permease	GFP collection (Huh et al., Nature, 2003)			C	C	-	Very low signal
JEN1	YKL217W	Not detected	Not detected	Not analyzed	Lactate and pyruvate permease	GFP collection (Huh et al., Nature, 2003)			C	C	-	Very low signal
GUP1	YGL084C	Not detected	Not detected	Not analyzed	Protein involved in glycerol uptake - unknown function	GFP collection (Huh et al., Nature, 2003)			ER	C	-	Very low signal
FUI1	YBL042C	Not detected	Not detected	Not analyzed	Uridine permease	GFP collection (Huh et al., Nature, 2003)			C	C	-	Very low signal
YGR125W	YGR125W	Not detected	Not detected	Not analyzed	Protein distantly related to sulfate permeases	GFP collection (Huh et al., Nature, 2003)			C/v	C/v	-	Very low signal
YPR003C	YPR003C	Not detected	Not detected	Not analyzed	Protein similar to sulfate permease - unknown function	GFP collection (Huh et al., Nature, 2003)			C	C	-	Very low signal
PHO87	YCR037C	Not detected	Not detected	Not analyzed	Low affinity phosphate transporter	GFP collection (Huh et al., Nature, 2003)			C	C	-	Very low signal
PHO89	YBR296C	Not detected	Not detected	Not analyzed	Na+/phosphate co-transporter	GFP collection (Huh et al., Nature, 2003)			C	C	-	Very low signal
PHO90	YJL198W	Not detected	Not detected	Not analyzed	Low affinity phosphate transporter	GFP collection (Huh et al., Nature, 2003)			C	C	-	Very low signal
PHO91	YNR013C	Not detected	Not detected	Not analyzed	Low affinity phosphate transporter	GFP collection (Huh et al., Nature, 2003)			C	C	-	Very low signal
KCH1	YJR054W	Not detected	Not detected	Not analyzed	Low affinity potassium transporter subunit	GFP collection (Huh et al., Nature, 2003)			C	C	-	Very low signal
NHA1	YLR138W	Not detected	Not detected	Not analyzed	Na+/H+ exchanger (also harbouring K+/H+ activity)	GFP collection (Huh et al., Nature, 2003)			C	C	-	Very low signal
ENA1	YDR040C	Not detected	Not detected	Not analyzed	Plasma membrane P-type ATPase involved in Na+ and Li+ efflux	GFP collection (Huh et al., Nature, 2003)			C	C	-	Very low signal
ENA2	YDR039C	Not detected	Not detected	Not analyzed	Plasma membrane P-type ATPase involved in Na+ and Li+ efflux	GFP collection (Huh et al., Nature, 2003)			C	C	-	Very low signal
ENA5	YDR038C	Not detected	Not detected	Not analyzed	Plasma membrane P-type ATPase involved in Na+ and Li+ efflux	GFP collection (Huh et al., Nature, 2003)			C	C	-	Very low signal
THI7	YLR237W	Not detected	Not detected	Not analyzed	Thiamine permase	GFP collection (Huh et al., Nature, 2003)			C	C	-
TNA1	YGR260W	Not detected	Not detected	Not analyzed	Nicotinic acid permease	GFP collection (Huh et al., Nature, 2003)			ER	ER	-
FEN2	YCR028C	Not detected	Not detected	Not analyzed	Pantothenate permease	GFP collection (Huh et al., Nature, 2003)			V/c	C/v	-
TPN1	YGL186C	Not detected	Not detected	Not analyzed	Pyridoxine (vitamin B6) transporter	GFP collection (Huh et al., Nature, 2003)			C	C	-
SAM3	YPL274W	Not detected	Not detected	Not analyzed	S-adenosylmethionine permease	GFP collection (Huh et al., Nature, 2003)			ER	ER	-
FCY2	YER056C	Not detected	Not detected	Not analyzed	Purine/cytosine permease	GFP collection (Huh et al., Nature, 2003)			V	V	?
BIO5	YNR056C	Not detected	Not detected	Not analyzed	Plasma membrane 7-keto 8-aminopelargonic acid permease	GFP collection (Huh et al., Nature, 2003)			C	C	-
ITR2	YOL103W	Not detected	Not detected	Not analyzed	Inositol permease	GFP collection (Huh et al., Nature, 2003)			C	C	-
FAT1	YBR041W	Not detected	Not detected	Not analyzed	Long-chain fatty acid transporter	GFP collection (Huh et al., Nature, 2003)			C	C	-	Very low signal
MMP1	YLL061W	Not detected	Not detected	Not analyzed	s-methylmethionine permease	GFP collection (Huh et al., Nature, 2003)			C	C	-	Very low signal
AVT7	YIL088C	Not detected	Not detected	Not analyzed	Putative transporter; member of a family of seven S. cerevisiae genes (AVT1-7) related to vesicular GABA-glycine transporters (vacuolar ?)	GFP collection (Huh et al., Nature, 2003)			C	C	-
ALR1	YOL130W	Not detected	Not detected	Not analyzed	Plasma membrane transporter of magnesium and other divalent cations	GFP collection (Huh et al., Nature, 2003)			C	C/dots	-	Very low signal
SIT1	YEL065W	Not detected	Not detected	Not analyzed	Transporter of the bacterial siderophore ferrioxamine B	GFP collection (Huh et al., Nature, 2003)			V	-	?
ARN1	YHL040C	Not detected	Not detected	Not analyzed	ARN family transporter for siderophore-iron chelates	GFP collection (Huh et al., Nature, 2003)			C	-	-	Very low signal
ZRT1	YGL255W	Not detected	Not detected	Not analyzed	Zinc transporter I	GFP collection (Huh et al., Nature, 2003)			ER	-	-
ZRT2	YLR130C	Not detected	Not detected	Not analyzed	Zinc transporter II	GFP collection (Huh et al., Nature, 2003)			ER/C	-	-
BOR1	YNL275W	Not detected	Not detected	Not analyzed	Protein involved in boron efflux - strongly similar to transporters of the anion exchanger family (band 3 protein)	GFP collection (Huh et al., Nature, 2003)			C	-	-	Very low signal
MNR2	YKL064W	Not detected	Not detected	Not analyzed	Manganese resistance protein	GFP collection (Huh et al., Nature, 2003)			C/dots	-	-	Very low signal
CTR2	YHR175W	Not detected	Not detected	Not analyzed	Protein involved in copper transport - Vacuolar membrane ?	GFP collection (Huh et al., Nature, 2003)			C/VM	-	-	Very low signal
ECM3	YOR092W	Not detected	Not detected	Not analyzed	Probable membrane tranporter with distant similarity with plant auxin efflux proteins	GFP collection (Huh et al., Nature, 2003)			C/VM	-	-	Very low signal
YBR287W	YBR287W	Not detected	Not detected	Not analyzed	Probable membrane tranporter with distant similarity with plant auxin efflux proteins	GFP collection (Huh et al., Nature, 2003)			ER/C	-	-
YNL095C	YNL095C	Not detected	Not detected	Not analyzed	Probable membrane tranporter with distant similarity with plant auxin efflux proteins	GFP collection (Huh et al., Nature, 2003)			C	-	-	Very low signal
YJR015W	YJR015W	Not detected	Not detected	Not analyzed	Protein similar to Sge1p, a probable transporter conferring resistance to nitrosoguanidine (MNNG) when overexpressed - unknown function	GFP collection (Huh et al., Nature, 2003)			ER/C	-	-	Very low signal
YMR010W	YMR010W	Not detected	Not detected	Not analyzed	Protein similar to the human lysosomal CTNS cystine transporter mediating H+-driven cystine export from lysosomes - unknown function	GFP collection (Huh et al., Nature, 2003)			dots	-	-
FLR1	YBR008C	Not detected	Not detected	Not analyzed	Putative H+ antiporter regulated by yAP-1 and involved in multidrug resistance	GFP collection (Huh et al., Nature, 2003)			C	-	-	Very low signal
QDR3	YBR043C	Not detected	Not detected	Not analyzed	Putative substrate-H+ antiporter - confers resistance to several drugs	GFP collection (Huh et al., Nature, 2003)			C	-	-	Very low signal
YCR023C	YCR023C	Not detected	Not detected	Not analyzed	Putative substrate-H+ antiporter - unknown biological function	GFP collection (Huh et al., Nature, 2003)			C/vm	-	-	Very low signal
PNS1	YOR161C	Not detected	Not detected	Not analyzed	Protein of unknown function; has similarity to Torpedo californica tCTL1p, which is postulated to be a choline transporter, neither null mutation nor overexpression affects choline transport	GFP collection (Huh et al., Nature, 2003)			C/v	-	-
ADP1	YCR011C	Not detected	Not detected	Not analyzed	Putative ATP-dependent permease of the ABC transporter family	GFP collection (Huh et al., Nature, 2003)			ER	ER	-
STE6	YKL209C	Not detected	Not detected	Not analyzed	`Full-size` ABC transporter responsible for export of the `a` factor mating pheromone	GFP collection (Huh et al., Nature, 2003)			V	V	?
DNF1	YER166W	Not detected	Not detected	Not analyzed	Plasma membrane P-type ATPase acting as a phospholipid translocase (flippase)	GFP collection (Huh et al., Nature, 2003)			C/dots	C/dots	-
DNF2	YDR093W	Not detected	Not detected	Not analyzed	Plasma membrane P-type ATPase acting as a phospholipid translocase (flippase)	GFP collection (Huh et al., Nature, 2003)			C/dots	C/dots	-
NFT1	YKR103W	Not detected	Not detected	Not analyzed	Putative transporter of the MRP subfamily;	GFP collection (Huh et al., Nature, 2003)			C	C	-
CCH1	YGR217W	Not detected	Not detected	Not analyzed	Calcium channel (alpha subunit) of the plasma membrane	GFP collection (Huh et al., Nature, 2003)			C/dots	C	-
FPS1	YLL043W	Not detected	Not detected	Not analyzed	Glycerol efflux channel of the plasma membrane - also involved in arsenite, antimonite and acetate uptake (MIP family)	GFP collection (Huh et al., Nature, 2003)			ER	ER	-
AQY2	YLL052C	Not detected	Not detected	Not analyzed	Plasma membrane aquaporin (water channel protein)	GFP collection (Huh et al., Nature, 2003)			C	C	-
SYG1	YIL047C	Not detected	Not detected	Not analyzed	Plasma membrane protein of unknown function; truncation and overexpression suppresses lethality of G-alpha protein deficiency	GFP collection (Huh et al., Nature, 2003)			VM	VM	-
MSB2	YGR014W	Not detected	Not detected	Not analyzed	Mucin family member involved in signaling	GFP collection (Huh et al., Nature, 2003)			V	V	?
SLN1	YIL147C	Not detected	Not detected	Not analyzed	Histidine kinase osmosensor that regulates a MAP kinase cascade	GFP collection (Huh et al., Nature, 2003)			C/ER/Dots	C/ER/Dots	-
OPY2	YPR075C	Not detected	Not detected	Not analyzed	Integral membrane protein that acts as a membrane anchor for Ste50p	GFP collection (Huh et al., Nature, 2003)			C/V	C/V	?
SHO1	YER118C	Not detected	Not detected	Not analyzed	Transmembrane osmosensor for filamentous growth and HOG pathways	GFP collection (Huh et al., Nature, 2003)			C/ER/Dots	C/V	-
STE2	YFL026W	Not detected	Not detected	Not analyzed	Receptor for alpha-factor pheromone	GFP collection (Huh et al., Nature, 2003)			V/pm	V	`++
SST2	YLR452C	Not detected	Not detected	Not analyzed	GTPase-activating protein for Gpa1p	GFP collection (Huh et al., Nature, 2003)			C	-	-
YDL012C	YDL012C	Not detected	Not detected	Not analyzed	Tail-anchored plasma membrane protein with a conserved CYSTM module	GFP collection (Huh et al., Nature, 2003)			C	-	-
BUD8	YLR353W	Not detected	Not detected	Not analyzed	Protein involved in bud-site selection	GFP collection (Huh et al., Nature, 2003)			C	-	-
BUD9	YGR041W	Not detected	Not detected	Not analyzed	Protein involved in bud-site selection	GFP collection (Huh et al., Nature, 2003)			C	-	-
FUS1	YCL027W	Not detected	Not detected	Not analyzed	Membrane protein localized to the shmoo tip	GFP collection (Huh et al., Nature, 2003)			C	-	-
CHS3	YBR023C	Not detected	Not detected	Not analyzed	Chitin synthase III	GFP collection (Huh et al., Nature, 2003)			C/dots	-	-
EXG2	YDR261C	Not detected	Not detected	Not analyzed	Exo-1,3-beta-glucanase	GFP collection (Huh et al., Nature, 2003)			C	-	-
GAS1	YMR307W	Not detected	Not detected	Not analyzed	Beta-1,3-glucanosyltransferase	GFP collection (Huh et al., Nature, 2003)			ER	-	-
FKS1	YLR342W	Not detected	Not detected	Not analyzed	Catalytic subunit of 1,3-beta-D-glucan synthase	GFP collection (Huh et al., Nature, 2003)			V/c	-	-
DCW1	YKL046C	Not detected	Not detected	Not analyzed	Putative mannosidase	GFP collection (Huh et al., Nature, 2003)			VM/ER	-	-
DFG5	YMR238W	Not detected	Not detected	Not analyzed	Putative mannosidase	GFP collection (Huh et al., Nature, 2003)			ER	-	-
CWH43	YCR017C	Not detected	Not detected	Not analyzed	Putative sensor/transporter protein involved in cell wall biogenesis	GFP collection (Huh et al., Nature, 2003)			ER	-	-
ERG25	YGR060W	Not detected	Not detected	Not analyzed	C-4 methyl sterol oxidase	GFP collection (Huh et al., Nature, 2003)			ER	-	-
YPS1	YLR120C	Not detected	Not detected	Not analyzed	Aspartic protease	GFP collection (Huh et al., Nature, 2003)			ER/C	-	-
YPS3	YLR121C	Not detected	Not detected	Not analyzed	Aspartic protease	GFP collection (Huh et al., Nature, 2003)			C/dots	-	-
PMP3	YDR276C	Not detected	Not detected	Not analyzed	Small plasma membrane protein related to family of plant polypeptides	GFP collection (Huh et al., Nature, 2003)			C	-	-
YEH2	YLR020C	Not detected	Not detected	Not analyzed	Steryl ester hydrolase	GFP collection (Huh et al., Nature, 2003)			C/dots	-	-
PGA3	YML125C	Not detected	Not detected	Not analyzed	Transmembrane protein of the plasma membrane, Putative cytochrome b5 reductase	GFP collection (Huh et al., Nature, 2003)			ER	-	-
KRE6	YPR159W	Not detected	Not detected	Not analyzed	Type II integral membrane protein	GFP collection (Huh et al., Nature, 2003)			C/v	-	-
VID22	YLR373C	Not detected	Not detected	Not analyzed	Glycosylated integral membrane protein localized to plasma membrane	GFP collection (Huh et al., Nature, 2003)			dots	-	-
YMC2	YBR104W	Not detected	Not detected	Not analyzed	Putative mitochondrial inner membrane transporter; proposed role in oleate metabolism and glutamate biosynthesis; member of the mitochondrial carrier (MCF) family; YMC2 has a paralog, YMC1, that arose from the whole genome duplication	GFP collection (Huh et al., Nature, 2003)			dots	-	-
LEM3	YNL323W	Not detected	Not detected	Not analyzed	Membrane protein of the plasma membrane and ER	GFP collection (Huh et al., Nature, 2003)			ER	-	-
ERD1	YDR414C	Not detected	Not detected	Not analyzed	Putative transport protein of inner membranes	GFP collection (Huh et al., Nature, 2003)			C	-	-
YNL194C	YNL194C	Not detected	Not detected	Not analyzed	Integral membrane protein, required for sporulation and plasma membrane sphingolipid content; similar to SUR7;	GFP collection (Huh et al., Nature, 2003)			C	-	-

## Sheet: AATs only
Supplementary file 1: Fluorescence microscopy-based screen for substrates of starvation-induced endocytosis
Color code:
Signal at PM decreased during starvation
Signal at PM increased during starvation
Signal at PM unchanged during starvation
No signal at the PM
Not included in the GFP library
Standard name	Systematic name	Fluorescence at PM during exp. growth	- N (fluorescence at PM compared to exp. growth)	+ Met (fluorescenceat PM compared to - Met)
MUP1	YGR055W	Yes	Decreased	Decreased
CAN1	YEL063C	Yes	Decreased	Unchanged
TAT2	YOL020W	Yes	Decreased	Unchanged
LYP1	YNL268W	Yes	Decreased	Unchanged
GAP1	YKR039W	Not detected	Increased	Not detected
DIP5	YPL265W	Yes	Unchanged, but vacuolar signal increased	Unchanged
GNP1	YDR508C	Yes	Unchanged, but vacuolar signal increased	Not analyzed
BAP2	YBR068C	Yes	Unchanged	Not analyzed
TAT1	YBR069C	Yes	Unchanged	Not analyzed
AGP1	YCL025C	screened, but no signal detected	screened, but no signal detected	Not analyzed
AGP2	YBR132C	screened, but no signal detected	screened, but no signal detected	Not analyzed
YCT1	YLL055W	screened, but no signal detected	screened, but no signal detected	Not analyzed
BAP3	YDR046C	screened, but no signal detected	screened, but no signal detected	Not analyzed
MMP1	YLL061W	screened, but no signal detected	screened, but no signal detected	Not analyzed
MUP3	YHL036W	screened, but no signal detected	screened, but no signal detected	Not analyzed
SAM3	YPL274W	mislocalized to the ER	mislocalized to the ER	Not analyzed
PUT4	YOR348C	not screened
AGP3	YFL055W	not screened
ALP1	YNL270C	not screened
HIP1	YGR191W	not screened
VBA5	YKR105C	not screened
TAT3		according the SGD, not encoded by BY4741
