# Supplementary material for: Complementary α-arrestin-ubiquitin ligase complexes control nutrient transporter endocytosis in response to amino acids
Source: eLife. 2020 Aug 3;9:e58246. doi: 10.7554/eLife.58246 (PMC7449699; doi:10.7554/eLife.58246)
Supplement: Supplementary file 2. [file elife-58246-supp2.xlsx]

## Sheet: Table S2
Supplementary file 2: Flow cytometry and fluorescence microscopy-based screen for genes specifically involved in starvation-induced endocytosis
Color code:			- N phenotype	Description
Starvation-induced endocytosis and vacuolar sorting of Mup1-pHluorin			1	fluorescence at the plasma membrane
Methionine- and starvation-induced endocytosis and vacuolar sorting of Mup1-pHluorin			2	fluorescence in small cytoplasmic objects
Methionin-induced endocytosis not tested			3	fluorescence in class E like objects
			4	fluorescence inside vacuoles
Systematic name	Standard name	- N (% cells with Mup1-pH signal)	- N phenotype	+ Met (% cells with Mup1-pH signal)	SGD annotated function
YIL087C	AIM19	79	1	12	protein of unknown function, mitochondrial protein that physically interacts with Tim23p
YIL158W	AIM20	77	1	18	protein of unknown function, GFP-fusion protein localizes to the vacuole
YHR126C	ANS1	100	1	1	GPI protein, GFP and mCherry fusion proteins localize to the vacuole
YHL019C	APM2	100	1	2	homolog of the medium chain of the clathrin-associated protein complex in mammals
YHR018C	ARG4	100	1	55	involved in biosynthesis of arginine
YHL047C	ARN2	100	1	10	transporter, responsible for uptake of siderophore-iron chelates
YBL101C	ART2	88	1	1	involved in regulating endocytosis / ubiquitination of PM proteins (for instance Mup1)
YIL146C	ATG32	98	1	25	mitochondrial outer membrane protein required to initiate mitophagy
YML081C-A	ATP18	84	1	7	subunit of the mitochondrial F1F0 ATP synthase
YIL015W	BAR1	77	1	6	aspartyl protease, helps cells find mating partners
YER155C	BEM2	61	1	2	Rho GTPase activating protein (RhoGAP), involved in the control of cytoskeleton organization and cellular morphogenesis, required for bud emergence
YML042W	CAT2	58	1	10	carnitine acetyl-CoA transferase, present in mitochondria and peroxisomes
YMR038C	CCS1	55	1	23	copper chaperone for superoxide dismutase Sod1p, involved in oxidative stress protection
YIL035C	CKA1	66	1	5	alpha catalytic subunit of casein kinase 2 (roles in cell growth and proliferation)
YFR046C	CNN1	100	1	3	kinetochore protein
YHR191C	CTF8	46	1	20	required for sister chromatid cohesion
YLR422W	DCK1	66	1	3	dock family protein (Dedicator Of CytoKinesis), upstream component for regulation through the small GTPase Rho5p, may form a complex with Lmo1p that acts as a GEF for Rho5p, implicated in mitophagy
YOR030W	DFG16	100	1	3	involved in growth changes upon nitrogen starvation, component of the Rim101 pathway
YOR005C	DNL4	100	1	2	DNA ligase, involved in meiosis, not essential for vegetative growth
YKL213C	DOA1	100	1	20	required for ubiquitin-mediated protein degradation, controls cellular ubiquitin concentration
YHL043W	ECM34	100	1	14	protein of unknown function, member of the DUP380 family (facilitates membrane trafficking)
YHR110W	ERP5	100	1	2	member of the p24 family, involved in ER to Golgi transport
YPR062W	FCY1	100	1	4	cytosine deaminase
YIL065C	FIS1	87	1	19	involved in mitochondrial fission and peroxisome abundance
YIL098C	FMC1	72	1	8	mitochondrial matrix protein
YJL161W	FMP33	61	1	9	Putative protein of unknown function, detected in purified mitochondria
YKL220C	FRE2	75	1	15	ferric reductase and cupric reductase, reduces siderophore-bound iron and oxidized copper prior to uptake
YCL058C	FYV5	74	1	25	involved in regulation of the mating pathway and ion homeostasis, overlaps with ADF1 (transcriptional repressor, negatively regulates transcription of FYV5)
YBR020W	GAL1	80	1	5	galactokinase
YER027C	GAL83	51	1	2	one of three possible beta-subunits of the Snf1 kinase complex
YDR283C	GCN2	46	1	27	protein kinase, phosphorylates alpha-subunit of translation initiation factor eIF2 in response to starvation
YFR009W	GCN20	53	1	10	positive regulator of the Gcn2p kinase activity, forms a complex with Gcn1p, overlaps with YFR009W-A (unlikely to encode a functional protein)
YKR026C	GCN3	100	1	10	subunit of the translation initiation factor eIF2B
YGR252W	GCN5	61	1	27	catalytic subunit of ADA and SAGA histone acetyltransferase complexes
YAL031C	GIP4	48	1	n.a.	cytoplasmic protein that regulates protein phosphatase 1 Glc7p, potential Cdc28p substrate, overlaps with YAL031W-A (unlikely to encode a functional protein)
YIL053W	GPP1	74	1	13	glycerol-3-phosphate phosphatase, involved in glycerol biosynthesis, induced in response to anaerobic and osmotic stress
YDL035C	GPR1	65	1	10	plasma membrane G protein coupled receptor, sensor that integrates nutritional signals with the modulation of cell fate via PKA and cAMP synthesis, overlaps with YDL034W (unlikely to encode a functional protein)
YIL041W	GVP36	100	1	9	localizes to early and late golgi vesicles, required for adaptation to varying nutrient concentrations, fluid-phase endocytosis, polarization of the actin cytoskeleton and vacuole biogenesis
YJL165C	HAL5	71	1	1	putative protein kinase
YNL281W	HCH1	100	1	3	heat shock protein regulator
YIL020C	HIS6	49	1	21	involved in histidine pathway, overlaps with ARS918 (putative replication origin) and YIL020C-A (unlikely to encode a functional protein)
YIL170W	HXT12	58	1	7	possible pseudogene, HXT12 and YIL171W together encode a non-functional member of the hexose transporter family
YNL215W	IES2	60	1	14	associates with the INO80 chromatin remodeling complex
YKR019C	IRS4	73	1	20	EH domain-containing protein, involved in regulating phosphatidylinositol 4,5-bisphosphate levels and autophagy
YNL265C	IST1	54	1	30	positive role in MVB sorting, interacts with Vps4p
YJL162C	JJJ2	100	1	1	protein of unknown function, contains a J-domain (homology to the E. coli DnaJ protein)
YCL005W	LDB16	45	1	0	protein involved in lipid droplet assembly overlaps with ARS307 (autonomously replicating sequence)
YLL007C	LMO1	82	1	1	homolog of mammalian ELMO (Engulfment and celL MOtility), upstream component for regulation through the small GTPase Rho5p, may form a complex with Dck1p that acts as a GEF for Rho5p, implicated in mitophagy
YNL100W	MIC27	71	1	5	component of the MICOS complex (mitochondrial inner membrane complex, involved in the maintenance of crista junctions, inner membrane architecture and formation of contact sites to the outer membrane)
YJL186W	MNN5	100	1	1	Alpha-1,2-mannosyltransferase
YHL036W	MUP3	100	1	16	low affinity methionine permease, similar to Mup1p
YLR194C	NCW2	100	1	0	structural constituent of the cell wall
YDR176W	NGG1	59	1	0	subunit of chromatin modifying histone acetyltransferase complexes (ADA, SAGA, SLIK)
YNL183C	NPR1	46	1	0	protein kinase, stabilizes several plasma membrane amino acid transporters by antagonizing their ubiquitin-mediated degradation
YBR129C	OPY1	48	1	0	protein of unknown function
YHL013C	OTU2	47	1	0	protein of unknown function, may interact with ribosomes
YOL115W	PAP2	83	1	8	poly(A) polymerase, involved in nuclear RNA degradation
YDR466W	PKH3	66	1	0	protein kinase with similarity to mammalian PDK1 and yeast Pkh1p/Phk2p, overlaps with YDR467C (unlikely to encode a functional protein)
YIL122W	POG1	71	1	0	nuclear chromatin-associated protein of unknown function, may have a role in cell cycle regulation
YKR013W	PRY2	100	1	4	sterol binding protein, involved in the export of acetylated sterols, overlaps with YKR012C (unlikely to encode a functional protein)
YNL180C	RHO5	100	1	11	GTPase, likely involved in protein kinase C-dependent signal transduction pathway that controls cell integrity, located close to YNL179C (unlikely to encode a functional protein)
YHL027W	RIM101	100	1	1	transcriptional repressor, involved in alkaline responsive gene repression
YFL033C	RIM15	74	1	10	protein kinase involved in cell proliferation in response to nutrients, substrate of Pho80p-Pho85p kinase
YNL294C	RIM21	100	1	2	pH sensor, component of the RIM101 pathway
YMR063W	RIM9	68	1	1	plasma membrane protein of unknown function, involved in the Rim101 pathway / activation of Rim101p
YKL006W	RPL14A	100	1	2	ribosomal 60S subunit protein
YHR200W	RPN10	100	1	10	component of the proteasome
YDL081C	RPP1A	76	1	16	ribosomal stalk protein P1 alpha, involved in the interaction between translational elongation factors and the ribosome, free (non-ribosomal) P1 stimulates the phosphorylation of the eIF2 alpha subunit (Sui2p) by Gcn2p
YHR031C	RRM3	100	1	1	DNA helicase
YHL034C	SBP1	58	1	9	protein that binds eIF4G and has a role in repression of translation, overlaps with YHL034W-A (unlikely to encode a functional protein)
YJL145W	SFH5	47	1	0	phosphatidylinositol transfer protein
YBR130C	SHE3	78	1	0	adaptor protein, part of the mRNA localization machinery that restricts accumulation of certain proteins to the bud, overlaps with YBR131C-A (unlikely to encode a functional protein)
YDL047W	SIT4	73	1	20	serine-threonine phosphatase, functions in G1/S transition of mitotic cycle, required for ER to Golgi traffic
YMR216C	SKY1	51	1	4	SR protein kinase, involved in regulating proteins involved in mRNA metabolism and cation homeostasis
YNR023W	SNF12	87	1	13	subunit of the SWI/SNF chromatin remodeling complex, involved in transcriptional regulation
YIL016W	SNL1	91	1	2	ribosome-associated protein, proposed to act in protein synthesis and nuclear pore complex biogenesis and maintenance as well as protein folding
YGL127C	SOH1	62	1	19	subunit of the RNA polymerase II mediator complex
YOL148C	SPT20	52	1	n.a.	subunit of the SAGA transcriptional regulatory complex
YHR041C	SRB2	78	1	11	subunit of the RNA polymerase II mediator complex
YLR389C	STE23	70	1	5	metalloprotease, involved in N-terminal processing of pro-a-factor to mature form
YIL039W	TED1	100	1	100	GPI-glycan remodelase
YGR033C	TIM21	100	1	3	nonessential component of the TIM23 complex (protein import into mitochondrial matrix and inner membrane)
YNL299W	TRF5	100	1	1	poly(A) polymerase, involved in nuclear RNA degradation
YKL211C	TRP3	57	1	10	indole-3-glycerol-phosphate synthase
YBR166C	TYR1	69	1	1	prephenate dehydrogenase, involved in tyrosine biosynthesis
YFR010W	UBP6	59	1	31	ubiquitin-specific protease of the proteasome, negatively regulates degradation of ubiquitinated proteins by the proteasome
YIL017C	VID28	82	1	5	GID complex subunit, involved in proteasome-dependent catabolite degradation of fructose-1,6-bisphosphatase
YHL035C	VMR1	100	1	22	vacuolar membrane protein, involved in drug resistance and metal sensitivity, located close to (97 bases) MUP3 (methionine permease)
YOR043W	WHI2	100	1	3	required for full activation of the general stress response
YBR063C	YBR063C	56	1	14	protein of unknown function, overlaps with YBR064W (unlikely to encode a functional protein)
YDL034W	YDL034W	69	1	27	unlikely to encode a functional protein, overlaps with GPR1 (plasma membrane G protein coupled receptor, sensor that integrates nutritional signals with the modulation of cell fate via PKA and cAMP synthesis)
YER137C	YER137C	94	1	20	putative protein of unknown function, overlaps with YER137W-A (unlikely to encode a functional protein)
YGR117C	YGR117C	58	1	9	putative protein of unknown function
YHL041W	YHL041W	73	1	20	protein of unknown function
YHR182W	YHR182W	100	1	1	protein of unknown function
YIL029C	YIL029C	89	1	13	putative protein of unknown function
YIL077C	YIL077C	75	1	25	protein of unknown function
YJL144W	YJL144W	73	1	14	essential in desiccation-rehydration process
YKR005C	YKR005C	100	1	2	protein of unknown function
YNL013C	YNL013C	89	1	0	unlikely to encode a functional protein, overlaps with HEF3 (translational elongation factor, member of the ABC superfamily)
YNL057W	YNL057W	85	1	20	unlikely to encode a functional protein, overlaps with YNL058C (putative protein of unknown function, GFP-fusion proteins localize to the vacuole)
YNL108C	YNL108C	88	1	1	protein phosphatase, null mutant shows alterations in glucose metabolism, overlaps with YNL109W (unlikely to encode a functional protein)
YNL338W	YNL338W	100	1	0	unlikely to encode a functional protein, overlaps TEL14L-XC (telomeric X element core sequence on the left arm of chromosome XIV)
YOR364W	YOR364W	70	1	97	unlikely to encode a functional protein, overlaps with YOR365C (putative protein of unknown function)
YJL139C	YUR1	67	1	24	mannosyltransferase, involved in protein N-glycosylation
YDR456W	ARS608	45	2	99	extremely inefficient autonomously replicating sequence
YGR260W	TNA1	70	2	91	high affinity nicotinic acid plasma membrane permease, overlaps with YGR259C (unlikely to encode a functional protein)
YOR106W	VAM3	69	2	88	vacuolar SNARE protein, mediates fusion of vesicles with the vacuole
YDL077C	VAM6	61	2	80	GEF for the GTPase Gtr1p, subunit of the HOPS endocytic tethering complex, facilitates tethering and promotes membrane fusion events at the late endosome and vacuole, overlaps with ARS412 (putative replication origin)
YKR001C	VPS1	100	2	90	dynamin-like GTPase, required for vacuolar sorting
YJL154C	VPS35	49	2	n.a.	endosomal subunit of the membrane-associated retromer complex
YGL095C	VPS45	68	2	n.a.	protein of the Sec1p/Munc-18 family, essential for vacuolar protein sorting, required for the function of Pep12p and the early endosome/late Golgi SNARE Tlg2p, essential for fusion of Golgi-derived vesicles with the prevacuolar compartment
YKR035W-A	DID2	100	3	100	protein of the vacuolar protein-sorting pathway, binds Vps4p and directs it to dissociate ESCRT-III complexes, overlaps with OPI8 (unlikely to encode a functional protein)
YKL002W	DID4	96	3	92	involved in MVB protein sorting (component of the ESCRT-III complex)
YDR069C	DOA4	100	3	11	ubiquitin hydrolase, ubiquitin recycling
YKR035C	OPI8	100	3	100	unlikely to encode a functional protein, overlaps with DID2 (class E protein of the vacuolar protein-sorting (Vps) pathway, directs Vps4p to ESCRT-III complexes)
YPL002C	SNF8	100	3	100	involved in MVB protein sorting (component of the ESCRT-II complex)
YMR077C	VPS20	92	3	100	involved in MVB protein sorting (component of the ESCRT-III complex)
YCL008C	VPS23	100	3	100	involved in MVB protein sorting (component of the ESCRT-I complex)
YKL041W	VPS24	97	3	94	involved in MVB protein sorting (component of the ESCRT-III complex)
YJR102C	VPS25	98	3	99	involved in MVB protein sorting (component of the ESCRT-II complex)
YNR006W	VPS27	70	3	80	endosomal protein that forms a complex with Hse1p, required for recycling Golgi proteins, forming lumenal membranes and sorting ubiquitinated proteins destined for degradation, overlaps with YNR005C (unlikely to encode a functional protein)
YPL065W	VPS28	100	3	100	involved in MVB protein sorting (component of the ESCRT-I complex)
YPL084W	VPS31	100	3	100	cytoplasmic class E vacuolar protein sorting (VPS) factor, coordinates deubiquitination in the MVB pathway by recruiting Doa4p to endosomes
YLR417W	VPS36	83	3	100	involved in MVB protein sorting (component of the ESCRT-II complex)
YPR173C	VPS4	100	3	100	involved in MVB protein sorting (ESCRT-III disassembly and membrane release)
YNR005C	YNR005C	57	3	100	dubious open reading frame, overlaps with VPS27 (required for recycling Golgi proteins)
YPL154C	PEP4	100	4	85	vacuolar aspartyl protease, required for precursor maturation of vacuolar proteases
