# Supplementary material for: Complementary α-arrestin-ubiquitin ligase complexes control nutrient transporter endocytosis in response to amino acids
Source: eLife. 2020 Aug 3;9:e58246. doi: 10.7554/eLife.58246 (PMC7449699; doi:10.7554/eLife.58246)
Supplement: Supplementary file 3. [file elife-58246-supp3.xlsx]

## Sheet: GO_macromolecular complex
Supplementary file 3: Gene ontology term analysis of 128 genes required for starvation-induced endocytosis of Mup1-pHluorin
					color code:
Starvation-induced endocytosis and vacuolar sorting of Mup1-pHluorin					starvation-specific gene
Methionine- and starvation-induced endocytosis and vacuolar sorting of Mup1-pHluorin					general endocytic trafficking
					not discriminated
	GO-TERM MACROMOLECULAR COMPLEX	enrichment over genome	CLUSTER_FREQUENCY	GENOME_FREQUENCY	ANNOTATED_GENES
GO:0000814	ESCRT II complex	53.6	2.50%	0.05%	SNF8, VPS25, VPS36
GO:0000815	ESCRT III complex	35.7333	3.33%	0.09%	DID2, DID4, VPS20, VPS24
GO:0000813	ESCRT I complex	26.8	1.67%	0.06%	STP22, VPS28
GO:0031499	TRAMP complex	17.8667	1.67%	0.09%	PAP2, TRF5
GO:0022626	cytosolic ribosome	13.4	1.67%	0.12%	GCN2, GCN20
GO:0005671	Ada2/Gcn5/Ada3 transcription activator complex	10.72	1.67%	0.16%	GCN5, NGG1
GO:0046695	SLIK (SAGA-like) complex	9.45882	2.50%	0.26%	GCN5, NGG1, SPT20
GO:0000124	SAGA complex	8.04	2.50%	0.31%	GCN5, NGG1, SPT20
GO:0070847	core mediator complex	5.36	1.67%	0.31%	SOH1, SRB2
GO:0000502	proteasome complex	4.02	2.50%	0.62%	DOA4, RPN10, UBP6
GO:0031201	SNARE complex	3.97037	1.67%	0.42%	VAM3, VPS45
GO:0016592	mediator complex	3.97037	1.67%	0.42%	SOH1, SRB2
GO:0000775	chromosome, centromeric region	1.37436	1.67%	1.21%	CNN1, GCN5
GO:0022625	cytosolic large ribosomal subunit	1.12842	1.67%	1.48%	RPL14A, RPP1A
GO:0010494	cytoplasmic stress granule	1.11667	1.67%	1.49%	SBP1, SKY1
GO:0005840	ribosome	0.442975	1.67%	3.76%	RPL14A, RPP1A

## Sheet: GO_Process
Supplementary file 3: Gene ontology term analysis of 128 genes required for starvation-induced endocytosis of Mup1-pHluorin
						color code:
						starvation-specific gene
						general endocytic trafficking
						not discriminated
	GO-TERM PROCESS	CLUSTER_FREQUENCY	GENOME_FREQUENCY	enrichment over genome	starvation-specific genes	ANNOTATED_GENES
GO:0007034	vacuolar transport	15.00%	2.83%	5.30687	2 of 18	APM2, BRO1, DID2, DID4, IST1, PEP4, SNF8, STP22, VAM3, VPS1, VPS20, VPS24, VPS25, VPS27, VPS28, VPS36, VPS4, VPS45
GO:0007568	aging	5.00%	1.06%	4.73456	6 of 6	DNL4, GCN5, GPR1, NGG1, RIM15, SIT4
GO:0016192	vesicle-mediated transport	14.17%	3.37%	4.20365	4 of 17	APM2, BRO1, DID2, DID4, DOA4, ECM34, ERP5, SNF8, STP22, VAM3, VAM6, VPS20, VPS24, VPS25, VPS27, VPS4, VPS45
GO:0007165	signal transduction	18.33%	5.68%	3.22536	20 of 22	ATG32, BAR1, BEM2, DCK1, FYV5, GAL83, GCN2, GPR1, HAL5, IRS4, LMO1, NPR1, PKH3, POG1, RHO5, RIM15, SIT4, SKY1, SPT20, VAM6, WHI2, YHR182W
GO:0051604	protein maturation	4.17%	1.48%	2.82412	4 of 5	DFG16, PEP4, RIM21, STE23, YMR038C
GO:0061024	membrane organization	6.67%	2.56%	2.60162	3 of 8	BRO1, DID4, DOA4, MIC27, SFH5, VPS20, VPS24, VPS4
GO:0006605	protein targeting	9.17%	3.88%	2.36097	1 of 11	DID2, PEP4, SNF8, STP22, TIM21, VPS1, VPS25, VPS27, VPS28, VPS36, VPS45
GO:0000003	reproduction	5.00%	2.25%	2.22034	6 of 6	BAR1, CKA1, FYV5, POG1, SHE3, STE23
GO:0071554	cell wall organization or biogenesis	10.00%	4.64%	2.15351	12 of 12	BAR1, ECM21, ECM34, FYV5, IRS4, MNN5, NCW2, PKH3, RIM101, RIM21, SIT4, YUR1
GO:0006810	transport	17.50%	8.18%	2.13819	6 of 21	APM2, BRO1, DID2, DID4, ECM21, ERP5, IST1, SNF8, STP22, TIM21, VAM3, VAM6, VPS20, VPS24, VPS25, VPS27, VPS28, VPS35, VPS36, VPS4, VPS45
GO:0009056	catabolic process	18.33%	8.71%	2.10425	15 of 22	ATG32, BAR1, DCK1, DOA1, FIS1, FMC1, GAL1, GCN2, IRS4, LMO1, PEP4, RIM15, RPL14A, STE23, STP22, VAM3, VAM6, VID28, VPS27, VPS36, VPS4, WHI2
GO:0007005	mitochondrion organization	8.33%	4.44%	1.87617	10 of 10	ATG32, ATP18, DCK1, FIS1, FMC1, LMO1, MIC27, RRM3, TIM21, WHI2
GO:0051301	cell division	5.83%	3.28%	1.78013	6 of 7	CNN1, DNL4, PAP2, POG1, SIT4, TRF5, VPS1
GO:0007049	cell cycle	9.17%	5.58%	1.64413	10 of 11	AIM20, CNN1, CTF8, DNL4, FYV5, PAP2, POG1, SIT4, TRF5, VPS1, WHI2
GO:0030154	cell differentiation	5.00%	3.08%	1.62601	6 of 6	CKA1, RIM101, RIM21, RIM9, SHE3, VID28
GO:0042592	homeostatic process	5.00%	3.35%	1.49051	6 of 6	ARN2, DOA1, DOA4, FRE2, GPR1, RRM3
GO:0007010	cytoskeleton organization	5.83%	4.38%	1.33194	6 of 7	BEM2, GVP36, LMO1, RHO5, SIT4, VPS1, WHI2
GO:0006457	protein folding	2.50%	1.88%	1.33037	3 of 3	HCH1, JJJ2, SNL1
GO:0065003	protein-containing complex assembly	8.33%	6.34%	1.31516	6 of 10	ATP18, CNN1, DID2, FMC1, GAL83, RPN10, SRB2, VAM6, VPS1, VPS45
GO:0006950	response to stress	5.00%	3.94%	1.26752	5 of 6	GCN2, PKH3, RIM101, SBP1, SPT20, YJL144W
GO:0006629	lipid metabolic process	6.67%	5.31%	1.25517	6 of 8	CAT2, IRS4, LDB16, NPR1, OPY1, SFH5, TED1, VPS4
GO:0048646	anatomical structure formation involved in morphogenesis	3.33%	2.69%	1.24066	4 of 4	RIM101, RIM21, RIM9, VID28
GO:0007059	chromosome segregation	3.33%	3.42%	0.975606	3 of 4	CNN1, CTF8, GIP4, SOH1
GO:0006520	cellular amino acid metabolic process	3.33%	3.45%	0.966817	3 of 4	ARG4, HIS6, TRP3, TYR1
GO:0055085	transmembrane transport	6.67%	7.08%	0.941374	7 of 8	ARN2, ATP18, MUP3, NPR1, TIM21, TNA1, VMR1, YIL170W
GO:0009058	biosynthetic process	12.50%	13.65%	0.915671	14 of 15	ARG4, ATP18, DNL4, FCY1, GPP1, HIS6, LDB16, MNN5, NGG1, NPR1, OPY1, TRP3, TYR1, VID28, YUR1
GO:0005975	carbohydrate metabolic process	3.33%	3.85%	0.865457	4 of 4	GAL1, GPP1, MNN5, VID28
GO:0034641	cellular nitrogen compound metabolic process	7.50%	8.91%	0.841333	9 of 9	BAR1, CAT2, FCY1, HIS6, NGG1, PAP2, STE23, TRF5, TRP3
GO:0051276	chromosome organization	3.33%	4.63%	0.720246	4 of 4	CNN1, CTF8, RRM3, SOH1
GO:0006351	transcription, DNA-templated	4.17%	6.13%	0.679219	5 of 5	GAL1, IRS4, RIM15, RRM3, SOH1
GO:0006259	DNA metabolic process	2.50%	3.71%	0.673536	3 of 3	CTF8, DNL4, RRM3
GO:0006412	translation	2.50%	4.43%	0.564825	3 of 3	GCN2, GCN3, RPL14A
GO:0044281	small molecule metabolic process	2.50%	4.57%	0.547534	3 of 3	GAL1, GPP1, VID28

## Sheet: GO_component
Supplementary file 3: Gene ontology term analysis of 128 genes required for starvation-induced endocytosis of Mup1-pHluorin
						color code:
						starvation-specific gene
						general endocytic trafficking
						not discriminated
	GO-TERM COMPONENT	CLUSTER_FREQUENCY	GENOME_FREQUENCY	enrichment over genome	starvation-specific genes	ANNOTATED_GENES
GO:0005768	endosome	16.67%	2.88%	5.79459	6 of 20	APM2, ARN2, BRO1, DID2, DID4, DOA1, DOA4, ECM34, IST1, SNF8, STP22, VPS1, VPS20, VPS24, VPS25, VPS27, VPS28, VPS35, VPS36, VPS4
GO:0005773	vacuole	18.33%	8.02%	2.28527	13 of 22	AIM20, ANS1, ARN2, ATG32, FRE2, MIC27, MUP3, NCW2, PEP4, PRY2, RHO5, SFH5, TNA1, VAM3, VAM6, VID28, VMR1, VPS1, VPS20, VPS27, VPS35, VPS45
GO:0005886	plasma membrane	15.83%	8.75%	1.80888	18 of 19	ANS1, ARN2, BEM2, DCK1, DFG16, FRE2, FYV5, GPR1, HAL5, IRS4, LMO1, NCW2, NPR1, OPY1, RHO5, RIM21, RIM9, SFH5, STP22
GO:0005777	peroxisome	2.50%	1.43%	1.74783	2 of 3	CAT2, FIS1, VPS1
GO:0005622	intracellular	5.00%	2.94%	1.70159	6 of 6	APM2, ATP18, BEM2, IRS4, RHO5, SFH5
GO:0005618	cell wall	3.33%	2.21%	1.50986	4 of 4	ANS1, BAR1, FYV5, NCW2
GO:0005576	extracellular region	2.50%	1.79%	1.39826	3 of 3	BAR1, FYV5, PRY2
GO:0005829	cytosol	21.67%	16.46%	1.31596	16 of 26	ARG4, BRO1, CKA1, DOA4, ECM21, ECM34, FYV5, GAL1, GCN3, GCN5, GVP36, HCH1, NPR1, PAP2, RPN10, SFH5, SNF12, STP22, VPS1, VPS20, VPS24, VPS25, VPS28, VPS35, VPS45, YMR038C
GO:0005794	Golgi apparatus	5.83%	4.76%	1.22614	6 of 7	APM2, ERP5, GVP36, MNN5, NPR1, VPS45, YUR1
GO:0005737	cytoplasm	48.33%	39.60%	1.22057	43 of 58	AIM20, APM2, ARG4, ATG32, BEM2, BRO1, DCK1, DID2, DID4, DOA1, DOA4, ECM21, ERP5, FCY1, GAL1, GAL83, GCN2, GIP4, GPP1, GVP36, HAL5, HCH1, HIS6, IRS4, IST1, JJJ2, LMO1, NPR1, OPY1, OTU2, RHO5, RIM101, RIM15, RPL14A, RPP1A, SBP1, SFH5, SHE3, SIT4, SKY1, SNF8, STP22, TRP3, TYR1, VID28, VPS1, VPS20, VPS24, VPS25, VPS28, VPS36, VPS4, VPS45, YGR117C, YHR182W, YJL144W, YMR038C, YNL108C
GO:0031410	cytoplasmic vesicle	2.50%	2.07%	1.20902	3 of 3	APM2, ERP5, RHO5
GO:0005739	mitochondrion	22.50%	18.92%	1.18915	24 of 27	AIM19, ATG32, ATP18, BEM2, CAT2, DCK1, DOA1, DOA4, FIS1, FMC1, FMP33, IRS4, LDB16, LMO1, MIC27, OPY1, PEP4, RHO5, SNL1, STE23, TIM21, TNA1, VMR1, VPS1, YIL077C, YKR005C, YMR038C
GO:0043226	organelle	8.33%	7.20%	1.15767	8 of 10	APM2, ERP5, IRS4, LDB16, RHO5, SFH5, SHE3, SNL1, TED1, VAM6
GO:0005634	nucleus	34.17%	36.27%	0.941963	39 of 41	AIM20, APM2, CKA1, CNN1, CTF8, DNL4, DOA1, FCY1, GAL83, GCN5, GPP1, HAL5, HCH1, HIS6, IES2, JJJ2, NGG1, NPR1, PAP2, POG1, RHO5, RIM101, RIM15, RPN10, RRM3, SBP1, SFH5, SIT4, SKY1, SNF12, SNL1, SOH1, SPT20, SRB2, TRF5, UBP6, VID28, VPS4, WHI2, YMR038C, YNL108C
GO:0005783	endoplasmic reticulum	9.17%	10.29%	0.890634	7 of 11	ERP5, PEP4, PRY2, RIM21, SFH5, SHE3, SNL1, TED1, VPS20, VPS4, YUR1
GO:0005730	nucleolus	2.50%	5.39%	0.463401	3 of 3	PAP2, SBP1, TRF5
