# Supplementary material for: Complementary α-arrestin-ubiquitin ligase complexes control nutrient transporter endocytosis in response to amino acids
Source: eLife. 2020 Aug 3;9:e58246. doi: 10.7554/eLife.58246 (PMC7449699; doi:10.7554/eLife.58246)
Supplement: Supplementary file 4. [file elife-58246-supp4.xlsx]

## Sheet: Primer
Supplementary file 4: Primer for cloning and PCR-based genetic modifications
Primer name	Primer for gene knock out / knock in	Used for strain(s)
HXT3-LT-F	GCATTGATGCATGATGACCAGCCATTCTACAAGAAAATGTTCGGCAAGAAATACCGGATCCCCGGGTTAATTAA	ISY001, ISY013, VIY042, ISY061
HXT3-LT-R	CCAATGTCTTTTATTAACTGTATCAGAGAATTATATATATAAAGTCATAAATCGAATTCGAGCTCGTTTAAAC	ISY001, ISY013, VIY042, ISY061
Art4d-F	ATCAACGCGATTTCATCACACCATTCGCTTCTCTTCCTCCATAAGTAATACGGATCCCCGGGTTAATTAA	ISY001, ISY026, ISY027, ISY030, ISY031, ISY053, ISY054
Art4d-R	TATTGCTCATATCTTTTTGTCGAAATTTCGAAGACAAAAAATAAAGCAGTGAATTCGAGCTCGTTTAAAC	ISY001, ISY026, ISY027, ISY030, ISY031, ISY053, ISY054
Art2d-F	TCTTTTAAATAGAGAAGAACAAGCAAGATTTTTCCCTACCCCTATTGGGCCGGATCCCCGGGTTAATTAA	ISY013, ISY027, ISY028, ISY031, ISY032, ISY054, ISY055, VIY012, VIY062, VIY063, VIY064, VIY065, VIY068, VIY092, VIY107
Art2d-R	CCTAATTAAATAGCATGTAGTCAACAAAAAGGGAGTAAAACATGCAGTGGGAATTCGAGCTCGTTTAAAC	ISY013, ISY027, ISY028, ISY031, ISY032, ISY054, ISY055, VIY012, VIY062, VIY063, VIY064, VIY065, VIY068, VIY092, VIY107
Mup1 DE/R F	GGCAGAGTCAGAACACAAAGAAGGGGCGTTATTGAAACGAATATAATCGAAC	ISY018
Mup1 DE/R R	CCTTCTTTGTGTTCTGACTCTGCCAATAGTGTCATCATAAACTTTGG	ISY018
Mup1-1533-F	GGTGGTGTTTACTACGTTGTTTGG	ISY018
188-Mup1-R	TTTTGATTTCGCGCAATAGTAGG	ISY018
Hxt3-Mup1(DE/R)_SHORT_F	CATTGATGCATGATGACCAGCCATTCTACAAGAAAATGTTCGGCAAGAAAGACACTATTGGCAGAGTCAGAACACAAAGAAGGG	ISY025, ISY026, ISY027, ISY028
Hxt3-1223-F	TACGCTTCTGTTGGTGTCACCAG	ISY025, ISY026, ISY027, ISY028, ISY029, ISY030, ISY031, ISY032, ISY042, ISY053, ISY054, ISY055
GFP-OE-F	CCATTACCTGTCCACACAATCTGCC	ISY025, ISY026, ISY027, ISY028, ISY029, ISY030, ISY031, ISY032, ISY042, ISY053, ISY054, ISY055
GFP-OE-R	GGCAGATTGTGTGGACAGGTAATGG	ISY025, ISY026, ISY027, ISY028, ISY029, ISY030, ISY031, ISY032, ISY042, ISY053, ISY054, ISY055
236 Hxt3 R	TGTTCGGCTCTCGCCGATGGTATG	ISY025, ISY026, ISY027, ISY028, ISY029, ISY030, ISY031, ISY032, ISY042, ISY053, ISY054, ISY055
Hxt3-Mup1 1732 F	GCATTGATGCATGATGACCAGCCATTCTACAAGAAAATGTTCGGCAAGAAAGACACTATTGGCGATGTCGATACACAAGAAG	ISY029, ISY030, ISY031, ISY032, ISY042, ISY053, ISY054, ISY055
Can1-D,E567R-F	ATTAGAGCAATTGTATGGAGACGTCATGAACCAAAGACTTTTTGG	ISY033
Can1-D,E567R-R	ACGTCTCCATACAATTGCTCTAATGCGTCTTCTATCGGAATCGATGTCG	ISY033
1099-CAN1-F	GAGAACTCTGGTACAAAGGTTTTGCCAC	ISY033
204-CAN1-R	GGTCTGAAGGAGTTTCAAATGCTTCTAC	ISY033
GCN1 -50 KO F	GATCATTAAGACAAACAAAGCTCTGACTGACACCAATAACTCCTACAGTGCGGATCCCCGGGTTAATTAA	JZY001
GCN1 +53 KO R	GAGAATAATATATCAAATACAAAAAGTAACGAGGTTACCACATTGAATTTTCTGAATTCGAGCTCGTTTAAAC	JZY001
GCN3 -50 KO F	GATAGAAAGAATTTTAAAAGTCCTACGTATACCAGAAATCGAGAGGAAGGCGGATCCCCGGGTTAATTAA	JZY002
GCN3 +60 KO R	CTCTTGCGCTTTTTCTCCTTTTCTATTAAGTCATTGCGTGCATATATTATGTGATTTTTTGAATTCGAGCTCGTTTAAAC	JZY002
GCN5 -50 KO F	GTGAGCCGCCCAAAAGTCTTCAGTTAACTCAGGTTCGTATTCTACATTACGGATCCCCGGGTTAATTAA	JZY003
GCN5 +50 KO R	GTACTAAACATTTATTTCTTCTTCGAAAGGAATAGTAGCGGAAAAGCTTCTTCTACGCAGAATTCGAGCTCGTTTAAAC	JZY003
GCN4_KO_F	CAATTTGTCTGCTCAAGAAAATAAATTAAATACAAATAAACGGATCCCCGGGTTAATTAA	OSY250
GCN4_KO_R	TGACGAAAAGAAAGATTCCACTACAGCGTCATCTAGCTCCGAATTCGAGCTCGTTTAAAC	OSY250
GCN2_KO_F	TCAATAATTTTCCGTTCCCCTTAACACATACTATGTATAACGGATCCCCGGGTTAATTAA	OSY354
GCN2_KO_R	CCAACTCTCTTTGAACAATTTCATCTATCCTTCGCTGCTCATCTGGAATTCGAGCTCGTTTAAAC	OSY354
Art1d-F	TGATTTTTACTCCTACTTAGTATACATTTCACTAAACAATACGTTTTACCCGGATCCCCGGGTTAATTAA	VIY011, VIY079, VIY107
Art1d-R	AGGTATCTAAGATAAAAATATATGGTAAATACCTTTAACGAATATTATAAGAATTCGAGCTCGTTTAAAC	VIY011, VIY079, VIY107
Art2-tag-F	GAGCCTCCGCGTTATGACGAAATAGTGCCTTTGATGAGTGATGAAGAACGGATCCCCGGGTTAATTAA	VIY030
Art2-tag-R	TATATATATAATTATCGTAGAATAATTCAAAAAAAAATAAAAAACGAAAAAATGAATTCGAGCTCGTTTAAAC	VIY030
Art1-tag-F	ATCAGAATACAAAACTTTTCCGATTTTCTAGATTCCAATAGAATAACCCAGCGGATCCCCGGGTTAATTAA	VIY031
Art1-tag-R	TATCTAAGATAAAAATATATGGTAAATACCTTTAACGAATATTATAAAATGAATTCGAGCTCGTTTAAAC	VIY031
Can1-LT-F	AAGATCATGAACCAAAGACTTTTTGGGACAAATTTTGGAATGTTGTAGCACGGATCCCCGGGTTAATTAA	VIY036, VIY062
Can1-LT-R	TGTTGTGGTGAATCATCGATAAAAATAAATATACTGAGATTATAGTAAGCGAATTCGAGCTCGTTTAAAC	VIY036, VIY062
Mup1-LT-R	GAAACGGAATAGCATCTTAAACTATTAAATGGCAGAAATTATAATGAGGTGAATTCGAGCTCGTTTAAAC	VIY054, VIY059, VIY076, VIY079, VIY082, VIY092, VIY242, VIY255, VIY263, YSM24
Mup1-LT-F	TTGAAACGAATATAATCGAACATTACAAAAGTGAACAAGAAAAATCGCTGCGGATCCCCGGGTTAATTAA	VIY054, VIY076, VIY079, VIY092, VIY255, VIY263, YSM24
S568-573A-F	CAAGAAGACGGCGTTATTGAAACGAATATAATCGAACATTACAAAGCTGAACAAGAAAAAGCGCTGCGGATCCCCGGGTTAATTAA	VIY059, VIY242
HXT2-LT-F	TGGAAATCTGGTAGCTGGATCTCAAAAGAAAAAAGAGTTTCCGAGGAATACCGGATCCCCGGGTTAATTAA	VIY063
HXT2-LT-R	CCAGACGTATGTAGGAACTTTTTAACGTCGAGTCCGTAAGATTTGATCAGGAATTCGAGCTCGTTTAAAC	VIY063
Tat2-LT-R	AGAGAAAAAAAAATATTCTACAAAAATAAATTGAACTTGTTTCTTCGGTAGAATTCGAGCTCGTTTAAAC	VIY064
Tat2NG-F	TGTACCTAGATTCCCGTCCATGGTACGTGAGACAGTTCCATTTCTGGTGTCGGATCCCCGGGTTAATTAA	VIY064
HXT1-LT-F	TAATGCATGATGACCAACCATTTTACAAGAGTTTGTTTAGCAGGAAATACCGGATCCCCGGGTTAATTAA	VIY065
HXT1-LT-R	TTTCTTGTTCCTTGGTGAAGGTCAAGAACTAGCAAAGAAAAGAACATCTGGAATTCGAGCTCGTTTAAAC	VIY065
Lyp1-LT-F	AAGACGACGAGCCTAAGAATTTATGGGAGAAATTCTGGGCTGCTGTTGCACGGATCCCCGGGTTAATTAA	VIY068
Lyp1-LT-R	TCTATTTTTTTATTTTTTTCTATTTTGAAGGCATGCAAGAGGTTCTGTGAGAATTCGAGCTCGTTTAAAC	VIY068
K567-572R-F	CAAGAAGACGGCGTTATTGAAACGAATATAATCGAACATTACAGAAGTGAACAAGAAAGATCGCTGCGGATCCCCGGGTTAATTAA	VIY073, VIY093
T560A-F	CAAGAAGACGGCGTTATTGAAGCGAATATAATCG	VIY076, VIY255
T552A-R	TTCAATAACGCCGTCTTCTTGTGCATCGACATCGCCAATAG	VIY076, VIY255
K27,28R-F	GAACTATCAATTTTCTTCTTCTACTACAAGAAGGGAAGTAAGTAACTCGAC	VIY082
G78N-F	TGTAATAGAATGCTTGGTACCAATGTTTTCGCCGTTTCCTCGACC	VIY263
G78N-R	GGTCGAGGAAACGGCGAAAACATTGGTACCAAGCATTCTATTACA	VIY263
NpatchF	TCCGCTTTTGAGGCAGCCCAGGCATTTGCTGCAGAAGCGGACCAAGGTGAAAAGCAG	VIY295
NpatchR	TGCCTGGGCTGCCTCAAAAGCGGAGGCACCGTTGTCAGC	VIY295
Nmod0F	GCTGCTGCTGCTGCAAGAAGGGAAGTAGCTAACGCGGCAGTGGATGCTGACAACGGTGCCGCCGATTTTGAGGCAGGCCAG	VIY335
Nmod0R	CCTTCTTGCAGCAGCAGCAGCAAATTGATAGTTCTCCCTGTTGAAGACATTCAACTGTGCCAGAAACGCTCTTCCTTCCGAC	VIY335
INA1-tag_F	CATTGAAGAACACGAAAGCCCCATTGATGCTGAAAAAAACTTTGCAAGGCGGATCCCCGGGTTAATTAA	OSY924
INA1-tag_R	GGATGGAGAATTGAAAAAATTTACGGGGTGATGTTGCATGATCTTCTTTTTGAATTCGAGCTCGTTTAAAC	OSY924
Primer name	Primer for plasmid cloning	Used for plasmid(s)
XhoI -pART2-F	AAAAACTCGAGATATCATTTTCGCAAGCACAGACTCCACGG	pIS001
NotI -Tart2-R	AAAAAGCGGCCGCAACCTAACCTAATTAAATAGCATGTAGTC	pIS001
Art2(PY748/A)-2192-F	GAAGTTCCCCAAATACGAAGATTTGGATAAAAGAACCGCAAAGATAATAGCAGCTGCCGGTATCGATGCATACACGAGC	pIS003
Art2-PY/A-748-F	GATAATAGCAGCTGCCGGTATCGATGCATACACG	pIS003
Art2-PY/A-748-R	GCATCGATACCGGCAGCTGCTATTATCTTTGCG	pIS003
Art2 +236 R	GGTGTCAATTCGGCAAGAGGTGTTC	pIS003
M13+	GTAAAACGACGGCCAGTGAGC	pIS003, pIS004
M13+R	GGAAACAGCTATGACCATGATTACG	pIS003, pIS004
Art2-KR 664 D-F	GATGACGATGACGAAAGAAGTGTATCATTATTTGAAATCAGAACTAAGG	pIS004
Art2-KR 664 D-R	TACACTTCTTTCGTCATCGTCATCGGAGGCGAAATCTAAATAATACGGATTATAAGGGTC	pIS004
pGcn4mut Art2-HTF AF	GATATCGAATTCCTGCAGCCCGGGGCGTTCAAATTACATTCAAATCACCAAGTGT	pJZ1, pJZ2
pGcn4mut Art2-HTF CR	ACCCGGGGATCCGTTCTTCATCACTCATCAAAGGCACTATTTC	pJZ1, pJZ2
pGcn4mut Art2-HTF DF	GAGTGATGAAGAACGGATCCCCGGGTTAATTAACAG	pJZ1, pJZ2
pGcn4mut Art2-HTF ER	GGTGGCGGCCGCTCTAGAACTAGTGGTTGCCGTCATTTATTATGCTATTTCATATTTC	pJZ1, pJZ2
pGcn4mut Art2-HTF AR	AGAACCCTTGGAAGATCAGAGATTGGAAAAATTAAGACCAATG	pJZ2
pGcn4mut Art2-HTF BF	CCAATCTCTGATCTTCCAAGGGTTCTCCACTTTCC	pJZ2
pGcn4mut Art2-HTF BR	TCTCTATTTAAAACCTTTCCGATGGACCTTCAAAAATATAAAC	pJZ2
pGcn4mut Art2-HTF CF	TCCATCGGAAAGGTTTTAAATAGAGAAGAACAAGCAAGATTTTTC	pJZ2
pGnc4mut Art2-HTF DR	TAAAAAACGAAAAAATTCACTTGTCATCGTCATCCTTGTAATC	pJZ2
pGcn4mut Art2-HTF EF	CGATGACAAGTGAATTTTTTCGTTTTTTATTTTTTTTTGAATTATTCTACG	pJZ2
XhoI-pART1-F	AAAAACTCGAGGGATAAAGCTAAGTTCCATGTATG	pVI009
NotI-Tart1-R	AAAAAGCGGCCGCAATGCCTGTATGTAGTTATCTGTG	pVI009
SfiI-Art2-F	AAAAGGCCCGTACGGCCATGCCGTTTATAACATCAAGACCGG	pVI013
SfiI-flag-R	AAAAGGCCCTTGTGGCCTCACTTGTCATCGTCATCCTTG	pVI013
pART2-XhoI-F	gcgCTCGAGATATCATTTTCGCAAGCACAGACTCCACGG	pOS258
pART2-ART1orf-F	GCAAGATTTTTCCCTACCCCTATTGGGCATGGCATTTTCACGTCTTACATCTACTCATCAG	pOS258
pART2-ART1orf-R	CTGATGAGTAGATGTAAGACGTGAAAATGCCATGCCCAATAGGGGTAGGGAAAAATCTTGC	pOS258
ART1-HTF-F	CCGATTTTCTAGATTCCAATAGAATAACCCAGCGGATCCCCGGGTTAATTAACAGAGG	pOS258
ART1-HTF-R	CCTCTGTTAATTAACCCGGGGATCCGCTGGGTTATTCTATTGGAATCTAGAAAATCGG	pOS258
tADH1_KpnI-R	gcgGGTACCAGATCTATATTACCCTGTTATCCCTAGCG	pOS258
